# Supplementary material
Source: PubMed Central journal article supplement (PMC3495191)
Supplement: NIHMS407039-supplement-Supplementary_Data.pdf [file NIHMS407039-supplement-Supplementary_Data.pdf]

# Supplementary Material to Augmented GEE for improving efficiency and validity of estimation in cluster randomized trials by leveraging cluster- and individual-level covariates

Alisa J. Stephens\*, Eric J. Tchetgen Tchetgen, and Victor De Gruttola

## Appendix A: $\hat{\beta}$ Solutions for Standard and Augmented Logistic GEE in cluster randomized designs

Let  $Y_{ij}$  denote the response (0 or 1) for the  $j_{th}$  individual in the  $i_{th}$  cluster.  $\mathbf{Y}_i = (Y_{i1}, Y_{i2}, \dots, Y_{in_i})^T$ , where  $n_i$  is the number of subjects within the  $i_{th}$  cluster. A typical model for binary data is  $E(Y_{ij}|A_i) = g(A_i; \beta) = g(\beta_0 + \beta_1 A_i)$ , where  $g$  is the inverse logit link function. The standard GEE for the marginal treatment effect are given by

$$\sum_{i=1}^m \psi_i(\mathbf{Y}, A; \beta) = \sum_{i=1}^m \mathbf{D}_i^T \mathbf{V}_i^{-1} \{\mathbf{Y}_i - \mathbf{g}(A_i; \beta)\} = \mathbf{0}, \quad (1)$$

where bold  $\mathbf{g}(A_i; \beta)$  denotes the  $n_i$ -dimensional link function for the outcome vector  $\mathbf{Y}_i$ ,  $\mathbf{D}_i$  is the  $n_i \times p$  matrix defined by  $\frac{\partial \mathbf{g}(A_i; \beta)}{\partial \beta^T}$ , and  $\mathbf{V}_i$  is a  $n_i \times n_i$  working covariance matrix for  $\mathbf{Y}_i$ .

$\mathbf{D}_i$  is composed of the  $n_i$ -dimensional columns  $\vec{D}_{i,0} = \frac{\partial \mathbf{g}(A_i; \beta)}{\partial \beta_0}$  and  $\vec{D}_{i,1} = \frac{\partial \mathbf{g}(A_i; \beta)}{\partial \beta_1}$ . Because of the cluster-randomized design,  $\vec{D}_{i,0}$  and  $\vec{D}_{i,1}$  are vectors of the form  $\vec{D}_{i,p} = (D_{i,p}, D_{i,p}, \dots, D_{i,p})^T$  for  $p = 0, 1$  (intercept and treatment effect), with

$$D_{i,0} = \frac{\partial g(A_i; \beta)}{\partial \beta_0} = \frac{\exp(\beta_0 + \beta_1 A_i)}{(1 + \exp(\beta_0 + \beta_1 A_i))} \left( 1 - \frac{\exp(\beta_0 + \beta_1 A_i)}{(1 + \exp(\beta_0 + \beta_1 A_i))} \right) = \pi(A_i) \{1 - \pi(A_i)\}$$

$$D_{i,1} = \frac{\partial g(A_i; \beta)}{\partial \beta_1} = \frac{\exp(\beta_0 + \beta_1 A_i) A_i}{(1 + \exp(\beta_0 + \beta_1 A_i))} \left( 1 - \frac{\exp(\beta_0 + \beta_1 A_i) A_i}{(1 + \exp(\beta_0 + \beta_1 A_i))} \right) = \pi(A_i) \{1 - \pi(A_i)\} A_i,$$

where  $\pi(A_i) = E(Y_{ij}|A_i)$ . We recall that  $\mathbf{D}_i$  is evaluated using an initial estimator  $\hat{\beta}_{init}$ , usually obtained from standard logistic regression that does not account for clustering.

The inverse working covariance matrix  $\mathbf{V}_i^{-1}$  can be broken down into its columns and scalar elements. Let  $\mathbf{V}_i^{-1} = \begin{bmatrix} \vec{V}_{i,1}^{-1} & \vec{V}_{i,2}^{-1} & \dots & \vec{V}_{i,n_i}^{-1} \end{bmatrix}$ , where  $\vec{V}_{i,j}^{-1}$  is the  $j_{th}$  column of  $\mathbf{V}_i^{-1}$ , and  $V_{i,q,j}^{-1}$  represents the scalar element in the  $q_{th}$  row,  $j_{th}$  column. Using this construction, after some matrix algebra, a closed form solution for  $\beta$  under a cluster randomized

design is given by

$$\hat{\beta}_0 = \text{logit} \left( \left[ \sum_{i=1}^m \left\{ I(A_i = 0) D_{i_0} \sum_{q,j \leq n_i} V_{i_{q,j}}^{-1} \right\} \right]^{-1} \left[ \sum_{i=1}^m \left\{ (\bar{D}_{i_0} - \bar{D}_{i_1})^T \sum_{j=1}^{n_i} (\bar{V}_{i,j}^{-1} Y_{ij}) \right\} \right] \right)$$

$$\hat{\beta}_1 = \text{logit} \left( \left[ \sum_{i=1}^m \left\{ I(A_i = 1) D_{i_1} \sum_{q,j \leq n_i} V_{i_{q,j}}^{-1} \right\} \right]^{-1} \left[ \sum_{i=1}^m \left\{ \bar{D}_{i_1}^T \sum_{j=1}^{n_i} (\bar{V}_{i,j}^{-1} Y_{ij}) \right\} \right] \right) - \hat{\beta}_0$$

This solution can be simplified using the working covariance structure. Under exchangeable correlation,  $V_{i_{q,q}} = \phi$  and  $V_{i_{q,j}} = \rho$  for  $q \neq j$ . We note working independence as a special case with off-diagonal elements  $\rho = 0$ . Proceeding, let  $\phi^{-1}$  and  $\rho^{-1}$  denote the diagonal and off-diagonal elements of  $\mathbf{V}_i^{-1}$ , respectively. The above simplifies to

$$\hat{\beta}_0 = \text{logit} \left( \left[ \sum_{i=1}^m D_{i_0} I(A_i = 0) \{n_i \phi^{-1} + n_i(n_i - 1) \rho^{-1}\} \right]^{-1} \times \left[ \sum_{i=1}^m \left\{ (D_{i_0} - D_{i_1}) \{ (n_i - 1) \rho_i^{-1} + \phi^{-1} \} \sum_{j=1}^{n_i} Y_{ij} \right\} \right] \right)$$

$$\hat{\beta}_1 = \text{logit} \left( \left[ \sum_{i=1}^m I(A_i = 1) D_{i_1} \{n_i \phi^{-1} + n_i(n_i - 1) \rho_1^{-1}\} \right]^{-1} \times \left[ \sum_{i=1}^m \left\{ D_{i_1} \{ (n_i - 1) \rho^{-1} + \phi^{-1} \} \sum_{j=1}^{n_i} Y_{ij} \right\} \right] \right) - \hat{\beta}_0$$

In the case of the augmented GEE, we estimate  $\hat{\beta}$  using the augmented estimating equations

$$\sum_{i=1}^m [\mathbf{D}_i^T \mathbf{V}_i^{-1} \{ \mathbf{Y}_i - \mathbf{g}(A_i; \beta) \} - (A_i - \pi) \hat{\gamma}(\mathbf{X}_i)] = \mathbf{0},$$

where  $\hat{\gamma}(X_i) = [\mathbf{D}_i(1)^T \mathbf{V}_i(1)^{-1} \{ f_1(\mathbf{X}_i; \hat{\eta}_1) - \mathbf{g}(1; \beta) \} - \mathbf{D}_i(0)^T \mathbf{V}_i(0)^{-1} \{ f_0(\mathbf{X}_i; \hat{\eta}_0) - \mathbf{g}(0; \beta) \}]$ .

Above, we take  $\mathbf{D}_i(k) = \frac{\partial \mathbf{g}(k; \beta)}{\partial \beta^T}$ ,  $\mathbf{V}_i(k) = \mathbf{V}_i$  evaluated under treatment  $k$ , and  $f_k(\mathbf{X}_i; \hat{\eta}_k) = \hat{E}[\mathbf{Y}_i | A_i = k, \mathbf{X}_i]$  for  $k = 0, 1$ . Vectors  $\bar{D}_{i_p}(k)$ ,  $\bar{V}_{i,j}^{-1}(k)$ , and scalars  $D_{i_p}(k)$ ,  $V_{i_{q,j}}^{-1}(k)$  are defined similarly as above, evaluated under treatment  $k$ . For brevity, we write  $\mathbf{F}_{k_i}$  below, where  $\mathbf{F}_{k_i} = f_k(\mathbf{X}_i; \hat{\eta}_k)$ . Solutions for  $\hat{\beta}_0$  and  $\hat{\beta}_1$  are given by

$$\hat{\beta}_0 = \text{logit} \left( \left[ (1 - \pi) \sum_{i=1}^m \left\{ D_{i_0}(0) \sum_{q,j \leq n_i} V_{i_{q,j}}^{-1}(0) \right\} \right]^{-1} \times \sum_{i=1}^m \left[ \sum_{j=1}^{n_i} \left\{ (\bar{D}_{i_0} - \bar{D}_{i_1})^T V_{i,j}^{-1} Y_{ij} - (A_i - \pi) \left( -\bar{D}_{i_0}(0) \bar{V}_{i,j}^{-1}(0) F_{0_{ij}} \right) \right\} \right] \right)$$

$$\hat{\beta}_1 = \text{logit} \left( \left[ \pi \sum_{i=1}^m \left\{ D_{i_1}(1) \sum_{q,j \leq n_i} V_{i_{q,j}}^{-1}(1) \right\} \right]^{-1} \times \sum_{i=1}^m \left[ \sum_{j=1}^{n_i} \left\{ (\bar{D}_{i_1}^T V_{i,j}^{-1} Y_{ij}) - (A_i - \pi) \left( \bar{D}_{i_1}(1)^T \bar{V}_{i,j}^{-1}(1) F_{1_{ij}} \right) \right\} \right] \right) - \hat{\beta}_0,$$

The simplified expression in case of exchangeable structure is

$$\begin{aligned} \hat{\beta}_0 &= \text{logit} \left( \left[ (1 - \pi) \sum_{i=1}^m D_{i_0}(0) \{n_i \phi^{-1} + n_i(n_i - 1) \rho_0^{-1}\} \right]^{-1} \times \right. \\ &\quad \left. \sum_{i=1}^m \left[ (D_{i_0} - D_{i_1}) \{ (n_i - 1) \rho_i^{-1} + \phi_i^{-1} \} \sum_{j=1}^{n_i} Y_{ij} - (A_i - \pi) \left\{ -D_{i_1}(0) \{ (n_i - 1) \rho_0^{-1} + \phi_0^{-1} \} \sum_{j=1}^{n_i} F_{0ij} \right\} \right] \right) \\ \hat{\beta}_1 &= \text{logit} \left( \left[ \pi \sum_{i=1}^m \left\{ D_{i_1}(1) \{ n_i \phi_1^{-1} + n_i(n_i - 1) \rho_1^{-1} \} \right\} \right]^{-1} \times \right. \\ &\quad \left. \sum_{i=1}^m \left[ D_{i_1} \{ (n_i - 1) \rho_i^{-1} + \phi_i^{-1} \} \sum_{j=1}^{n_i} Y_{ij} - (A_i - \pi) \left\{ D_{i_1}(1) \{ (n_i - 1) \rho_1^{-1} + \phi_1^{-1} \} \sum_{j=1}^{n_i} F_{1ij} \right\} \right] \right) - \hat{\beta}_0, \end{aligned}$$

where we maintain the index  $i$  in  $D_{i_p}(k)$  to be consistent with the unsimplified expressions above, in which the index  $i$  on  $\vec{D}_{i_p}(k)$  is retained to be mindful of varying cluster size. The quantity  $D_{i_p}(k)$ , however, is a fixed function of  $E(Y_{ij}|A_i = k)$ .

## Appendix B: Variance Estimators

Let  $\mathbf{Y}_i$  be the  $n_i$ -dimensional response vector,  $A_i$  the scalar treatment variable, and  $\mathbf{X}_i$  a collection of baseline covariates potentially at the cluster and individual level. The model  $E(\mathbf{Y}_i|A_i) = \mathbf{g}(A_i; \beta)$  is assumed, and the estimator  $\hat{\beta}$  is obtained by solving the augmented estimating equations detailed in Section 2. Recall that  $\mathbf{V}_i$  is a working covariance matrix as typically used in GEE for estimating coefficients in restricted moment models and  $\pi = P(A_i = 1)$ . Formulas for the variance estimators discussed in section 3 are presented below. The asymptotic variability of  $\hat{\beta}_{aug}$  is shown to be  $\text{var}(\hat{\beta}_{aug}) = \Gamma^{-1} \Delta \Gamma^{-1T}$ , where  $\Gamma = E \left[ \frac{\partial \psi_{i_{opt}}(\mathbf{Y}, A, \mathbf{X}; \beta)}{\partial \beta^T} \right]$ , and  $\Delta = E \left[ \psi_{i_{opt}}(\mathbf{Y}, A, \mathbf{X}; \beta) \otimes^2 \right]$ , with  $U \otimes^2 = U U^T$ . In each of the below,  $\hat{\Gamma} = m^{-1} \sum_i \mathbf{D}_i^T \mathbf{V}_i^{-1} \mathbf{D}_i$ . The four variance estimators considered are:

1.  $\hat{var}_1(\hat{\beta}_{aug}) = \hat{\Gamma}^{-1} \hat{\Delta} \hat{\Gamma}^{-1T}$ , where  $\hat{\Delta} = m^{-1} \sum_{i=1}^m \hat{\psi}_{i_{opt}} \otimes^2$ , and

$$\begin{aligned} \hat{\psi}_{i_{opt}}(\mathbf{Y}, A, \mathbf{X}; \beta) &= \mathbf{D}_i^T \mathbf{V}_i^{-1} \{ \mathbf{Y}_i - \mathbf{g}(A_i; \hat{\beta}_{aug}) \} \\ &\quad - (A_i - \pi) \left[ \mathbf{D}_i(1)^T \mathbf{V}_i(1)^{-1} \{ f_1(\mathbf{X}_i; \hat{\eta}_1) - \mathbf{g}(1; \hat{\beta}_{aug}) \} - \mathbf{D}_i(0)^T \mathbf{V}_i(0)^{-1} \{ f_0(\mathbf{X}_i; \hat{\eta}_0) - \mathbf{g}(0; \hat{\beta}_{aug}) \} \right] \end{aligned}$$

2.  $\hat{var}_2(\hat{\beta}_{aug}) = \hat{\Gamma}^{-1} \hat{\Delta}^* \hat{\Gamma}^{-1T}$ , where  $\hat{\Delta}^* = m^{-1} \sum_{i=1}^m (\mathbf{H}_i \hat{\psi}_i) \otimes^2$ , and  $\mathbf{H}_i$  is a diagonal matrix with  $H_{ijj} = \left[ 1 - \min\{q, (\frac{\partial \psi_i(\mathbf{Y}_i, A, \mathbf{X}_i; \beta)}{\partial \beta^T} \times \hat{\Gamma})_{jj}\} \right]^{-1/2}$  [1], and  $\hat{\psi}_i = \hat{\psi}_i(\mathbf{Y}, A, \mathbf{X}; \beta)$  is as defined in 1).

3.  $\hat{var}_3(\hat{\beta}_{aug}) = \hat{\Gamma}^{-1} \tilde{\Delta} \hat{\Gamma}^{-1T}$ , where  $\tilde{\Delta} = m^{-1} \sum_{i=1}^m \tilde{\psi}_{i_{opt}} \otimes^2$ , and

$$\begin{aligned} \tilde{\psi}_{i_{opt}} &= \mathbf{D}_i^T \mathbf{V}_i^{-1} \{ \mathbf{Y}_i - \mathbf{g}(A_i; \hat{\beta}_{aug}) \} \\ &\quad - (A_i - \pi) \left[ \mathbf{D}_i(1)^T \mathbf{V}_i(1)^{-1} \{ f_1(\mathbf{X}_i; \hat{\eta}_1) - \mathbf{g}(1; \hat{\beta}_{aug}) \} - \mathbf{D}_i(0)^T \mathbf{V}_i(0)^{-1} \{ f_0(\mathbf{X}_i; \hat{\eta}_0) - \mathbf{g}(0; \hat{\beta}_{aug}) \} \right] \\ &\quad - (A_i - \pi) \left[ \mathbf{D}_i(1)^T \mathbf{V}_i(1)^{-1} \{ f'_1(\mathbf{X}_i; \hat{\eta}_1) \} \hat{\zeta}_1(\mathbf{Y}_i, \mathbf{X}_i; \hat{\eta}_1) - \mathbf{D}_i(0)^T \mathbf{V}_i(0)^{-1} \{ f'_0(\mathbf{X}_i; \hat{\eta}_0) \} \hat{\zeta}_0(\mathbf{Y}_i, \mathbf{X}_i; \hat{\eta}_0) \right]. \end{aligned}$$

$\hat{\zeta}_k(\mathbf{Y}_i, \mathbf{X}_i; \hat{\eta})$  is the first order approximation of the term  $(\hat{\eta}_k - \eta^*)$  that results from estimation of  $\eta_k$  in  $E(\mathbf{Y}_i|\mathbf{X}_i, A_i)$ . If  $E(\mathbf{Y}_i|\mathbf{X}_i, A_i)$  is estimated by linear regression,  $\hat{\zeta}_k(\mathbf{Y}_i, \mathbf{X}_i; \hat{\eta}) = \left( \sum_{i=1}^m \mathbf{X}_i^T \mathbf{X}_i \right)^{-1} \sum_{i=1}^m \mathbf{X}_i^T (\mathbf{Y}_i -$

$\mathbf{X}_i \hat{\eta}_k$ ). For nonlinear models, in which  $E(\mathbf{Y}_i | \mathbf{X}_i, A_i) = \mu(\mathbf{X}_i; \eta_k)$ ,  $(\hat{\eta}_k - \eta_k^*)$  may be approximated by  $\left( \sum_{i=1}^m \mathbf{F}_i^T \mathbf{W}_i^{-1} \mathbf{F}_i \right)^{-1} \sum_{i=1}^m \mathbf{F}_i^T \mathbf{W}_i^{-1} (\mathbf{Y}_i - \mu(\mathbf{X}_i; \hat{\eta}_k))$ , where  $\mathbf{F}_i = \left. \frac{\partial \mu_k(\mathbf{X}_i; \eta)}{\partial \eta} \right|_{\eta_k = \hat{\eta}_k}$ , and  $\mathbf{W}_i$  is a diagonal matrix with  $W_{i,jj} = \phi_\mu \nu(\mu)$ , following from generalized linear model theory. The function  $\nu(\mu)$  denotes the variance function and  $\phi_\mu$  the dispersion parameter. We include the subscript  $\mu$  in  $\phi_\mu$  to distinguish from  $\phi$  involved in characterizing  $V(Y_{ij} | A_i)$  in the main text.

4.  $\hat{v}ar_4(\hat{\beta}_{aug}) = \hat{\Gamma}^{-1} \tilde{\Delta}^* \hat{\Gamma}^{-1T}$ , where  $\tilde{\Delta}^* = m^{-1} \sum_i (\mathbf{H}_i \tilde{\psi}_i) \otimes^2$ , with  $\tilde{\psi}$  and  $\mathbf{H}_i$  are as defined above. In 2) and 4), the lower bound  $q$  is typically set to 0.75 to prevent gross inflation [1].

## Appendix C: Additional Simulations

**Table 1. Standard vs. Augmented GEE, Binary Outcome: 250 clusters, low and high association,  $\rho = 0.05$ .** *Std: unaugmented. Correlation is exchangeable for all estimators. C,F,O,W: augmentation with 'Correct', 'Forward' selected, 'One-variable', or 'Wrong' model. ML, OLS: augmentation fit with maximum likelihood or ordinary least squares. SE: average unadjusted sandwich. MC RE: square of the Monte Carlo SE of the Std(Exch) estimator divided by the Monte Carlo SE for the indicated estimator. Coverage: coverage based on unadjusted sandwich SE.*

|             | Estimator | $\hat{\beta}_1$ | Bias   | SE     | MC SE  | MC RE  | Coverage |
|-------------|-----------|-----------------|--------|--------|--------|--------|----------|
| m=250, low  | Std       | -0.3036         | 0.0077 | 0.0739 | 0.0778 | 1.0000 | 0.936    |
|             | C - ML    | -0.3029         | 0.0069 | 0.0705 | 0.0744 | 1.0951 | 0.935    |
|             | C - OLS   | -0.3032         | 0.0072 | 0.0710 | 0.0750 | 1.0778 | 0.937    |
|             | F - ML    | -0.3023         | 0.0064 | 0.0701 | 0.0753 | 1.0683 | 0.935    |
|             | F - OLS   | -0.3026         | 0.0066 | 0.0703 | 0.0757 | 1.0571 | 0.937    |
|             | O - ML    | -0.3033         | 0.0073 | 0.0717 | 0.0752 | 1.0704 | 0.937    |
|             | O - OLS   | -0.3033         | 0.0073 | 0.0717 | 0.0754 | 1.0658 | 0.935    |
|             | W - ML    | -0.3034         | 0.0075 | 0.0728 | 0.0768 | 1.0271 | 0.938    |
| W - OLS     | -0.3035   | 0.0075          | 0.0728 | 0.0768 | 1.0258 | 0.938  |          |
| m=250, high | Std       | 1.1310          | 0.0052 | 0.0567 | 0.0576 | 1.0000 | 0.943    |
|             | C - ML    | 1.1314          | 0.0047 | 0.0489 | 0.0497 | 1.3429 | 0.940    |
|             | C - OLS   | 1.1313          | 0.0049 | 0.0496 | 0.0505 | 1.2989 | 0.943    |
|             | F - ML    | 1.1314          | 0.0047 | 0.0485 | 0.0502 | 1.3156 | 0.937    |
|             | F - OLS   | 1.1314          | 0.0048 | 0.0491 | 0.0510 | 1.2719 | 0.941    |
|             | O - ML    | 1.1312          | 0.0050 | 0.0501 | 0.0509 | 1.2799 | 0.934    |
|             | O - OLS   | 1.1313          | 0.0048 | 0.0506 | 0.0512 | 1.2651 | 0.941    |
|             | W - ML    | 1.1310          | 0.0051 | 0.0531 | 0.0542 | 1.1301 | 0.938    |
| W - OLS     | 1.1310    | 0.0051          | 0.0533 | 0.0542 | 1.1266 | 0.937  |          |

**Table 2. Standard vs. Augmented GEE, Binary Outcome: 250 clusters, low and high association,  $\rho = 0.05$ .** *Std: unaugmented. Correlation is exchangeable for all estimators. C,F,O,W: augmentation with 'Correct', 'Forward' selected, 'One-variable', or 'Wrong' model. ML, OLS: augmentation fit with maximum likelihood or ordinary least squares. SE: average unadjusted sandwich. MC RE: square of the Monte Carlo SE of the Std(Exch) estimator divided by the Monte Carlo SE for the indicated estimator. Coverage: coverage based on unadjusted sandwich SE.*

|             | Estimator | $\hat{\beta}_1$ | Bias   | SE     | MC SE  | MC RE  | Coverage |
|-------------|-----------|-----------------|--------|--------|--------|--------|----------|
| m=250, low  | Std       | -0.2299         | 0.0135 | 0.1164 | 0.1190 | 1.0000 | 0.938    |
|             | C - ML    | -0.2290         | 0.0126 | 0.1144 | 0.1173 | 1.0293 | 0.936    |
|             | C - OLS   | -0.2293         | 0.0129 | 0.1146 | 0.1175 | 1.0256 | 0.935    |
|             | F - ML    | -0.2276         | 0.0112 | 0.1135 | 0.1185 | 1.0077 | 0.932    |
|             | F - OLS   | -0.2280         | 0.0116 | 0.1135 | 0.1187 | 1.0041 | 0.933    |
|             | O - ML    | -0.2294         | 0.0130 | 0.1150 | 0.1175 | 1.0253 | 0.935    |
|             | O - OLS   | -0.2295         | 0.0130 | 0.1150 | 0.1176 | 1.0234 | 0.935    |
|             | W - ML    | -0.2296         | 0.0131 | 0.1155 | 0.1188 | 1.0020 | 0.931    |
|             | W - OLS   | -0.2297         | 0.0132 | 0.1155 | 0.1188 | 1.0021 | 0.932    |
| m=250, high | Std       | 1.0429          | 0.0072 | 0.0883 | 0.0887 | 1.0000 | 0.944    |
|             | C - ML    | 1.0436          | 0.0065 | 0.0835 | 0.0848 | 1.0936 | 0.949    |
|             | C - OLS   | 1.0435          | 0.0066 | 0.0839 | 0.0851 | 1.0871 | 0.948    |
|             | F - ML    | 1.0442          | 0.0059 | 0.0828 | 0.0858 | 1.0694 | 0.938    |
|             | F - OLS   | 1.0444          | 0.0058 | 0.0831 | 0.0860 | 1.0643 | 0.941    |
|             | O - ML    | 1.0433          | 0.0068 | 0.0842 | 0.0851 | 1.0863 | 0.951    |
|             | O - OLS   | 1.0435          | 0.0067 | 0.0844 | 0.0851 | 1.0861 | 0.949    |
|             | W - ML    | 1.0431          | 0.0070 | 0.0859 | 0.0869 | 1.0409 | 0.951    |
|             | W - OLS   | 1.0431          | 0.0070 | 0.0860 | 0.0869 | 1.0406 | 0.950    |

## References

1. Fay MP, Graubard BI. Small-sample adjustments for wald-type tests using sandwich estimators. *Biometrics* 2001; **57**:1198–1206. DOI: 10.1111/j.0006-341X.2001.01198.x.
